# Supplementary material for: Influence Modeling of muddy phosphate mining waste discharge on hydrodynamics in the Beninese-Togolese coastal waters and transport of waste phases
Source: Research Square preprint supplement (doi:10.21203/rs.3.rs-6298265/v1), 2025-05-02
Supplement: Supplementary file 1 [file ef7cf765c7f2edb0c0ecc933.docx]

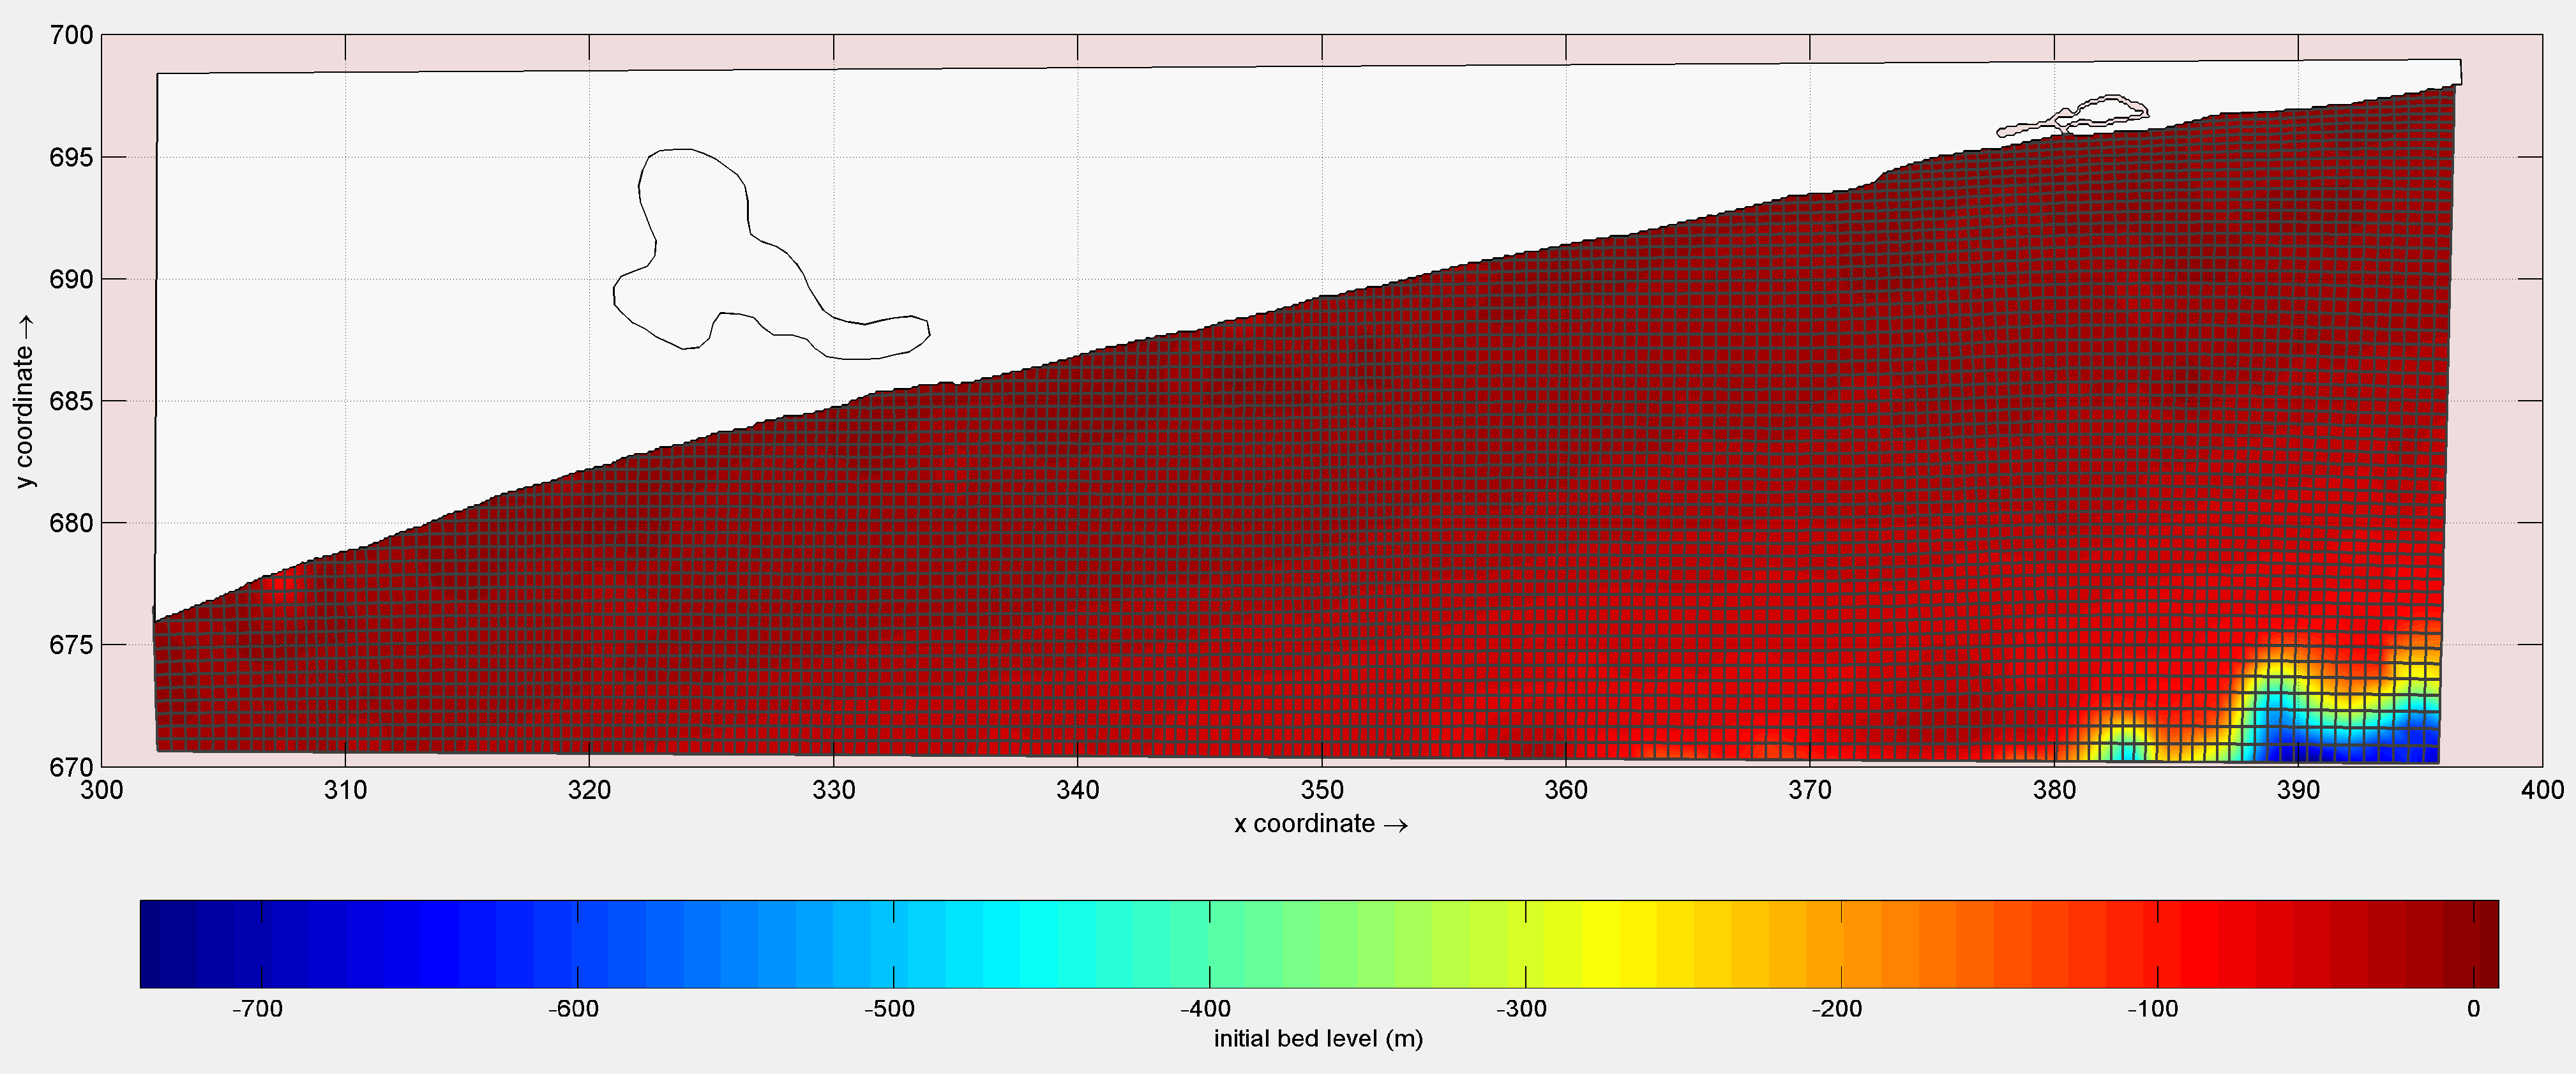


**Fig. 31** Mesh configuration and bathymetry of the model for the extended warm season


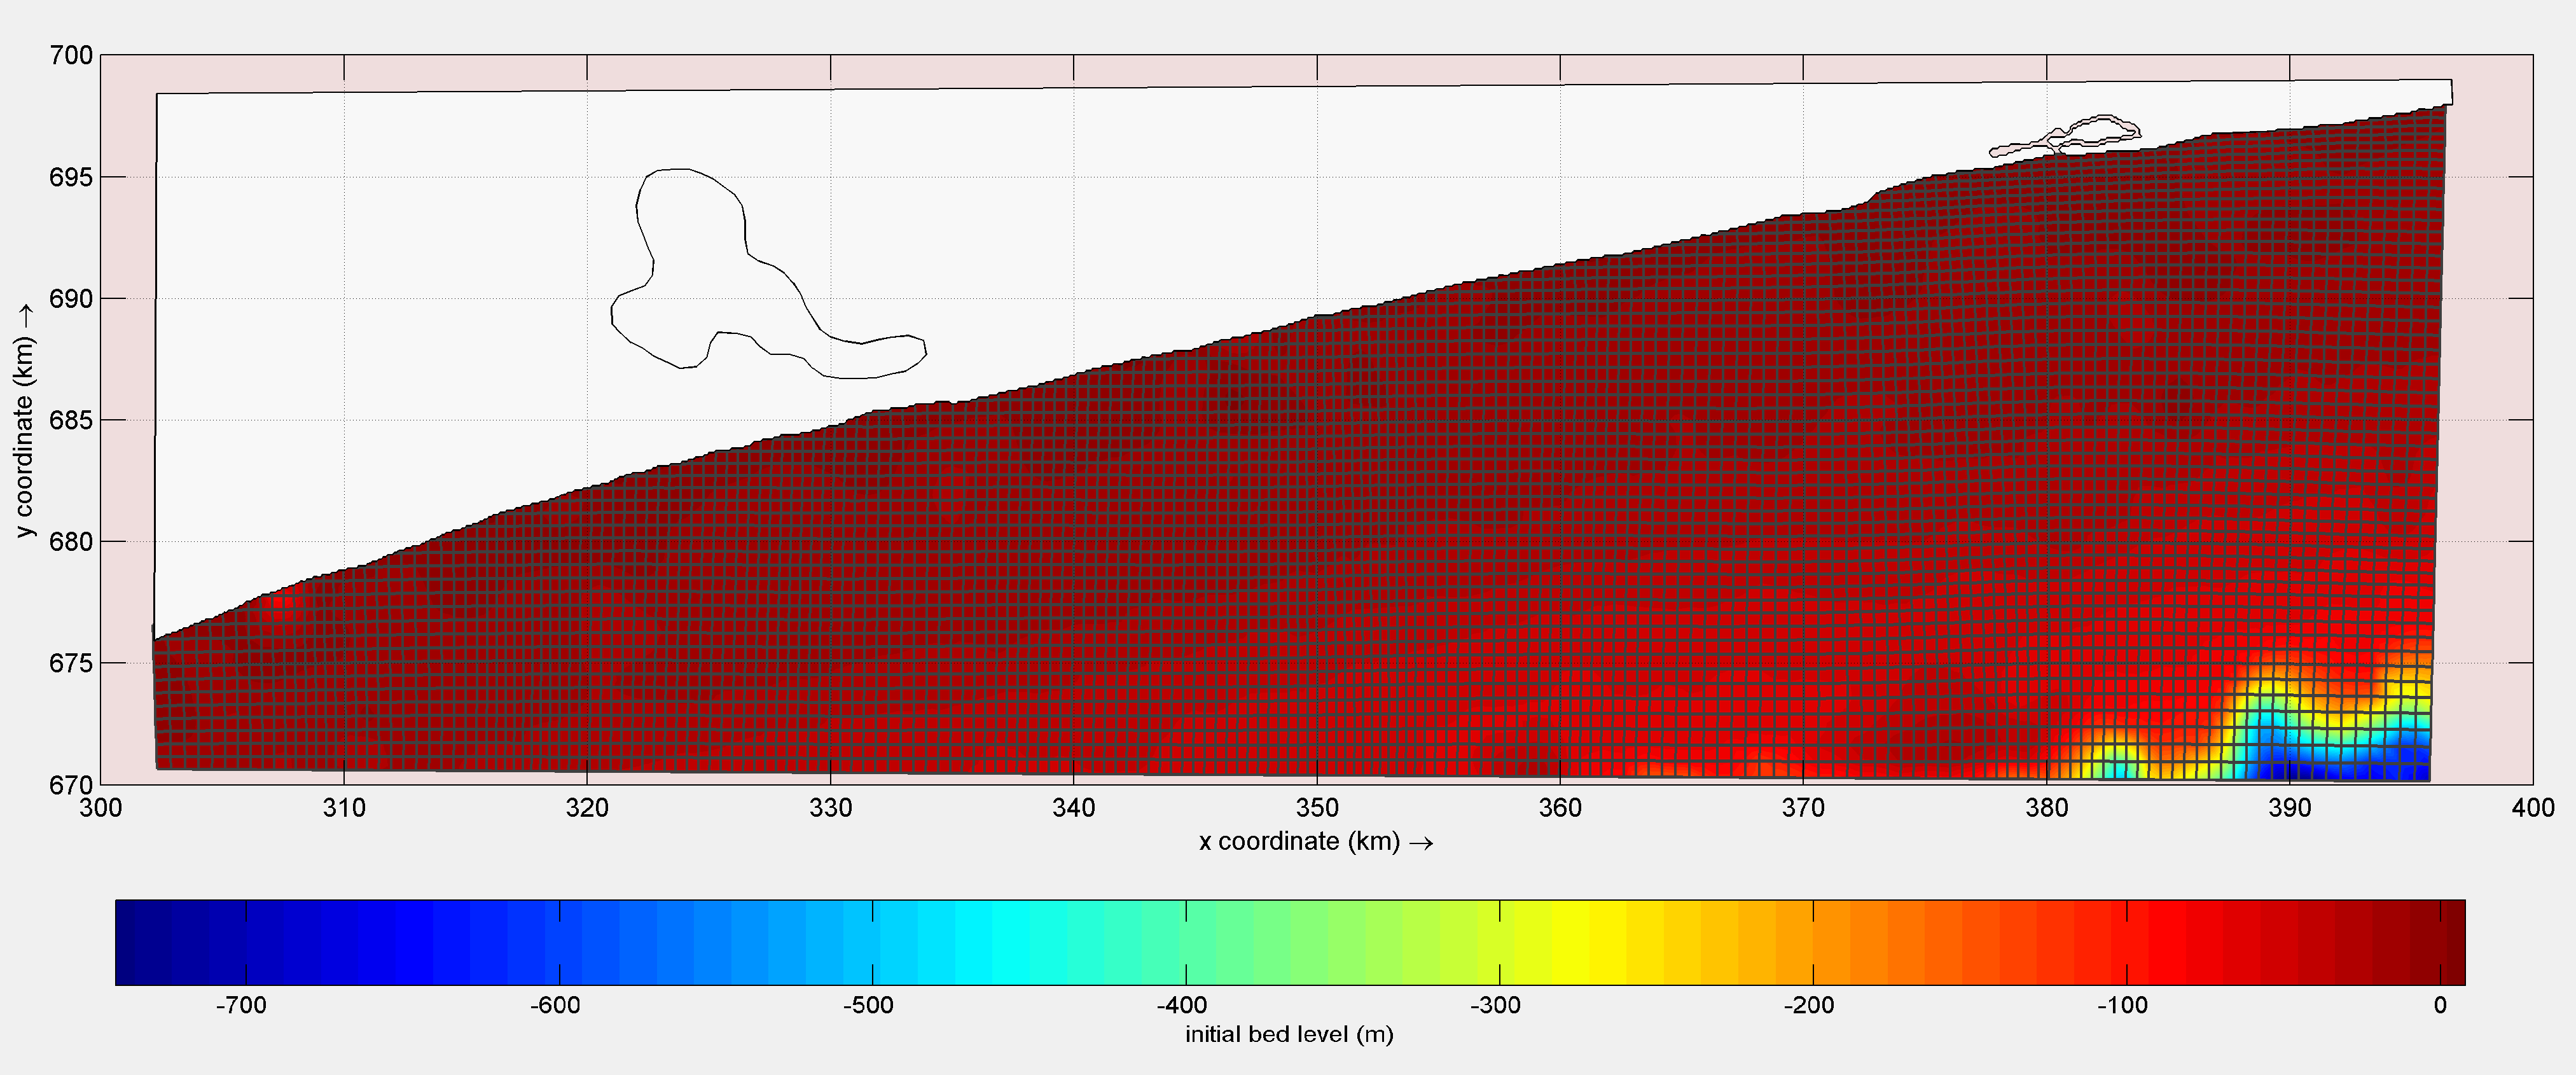


**Fig. 32** Mesh configuration and bathymetry of the model for the extensive cold season
