# Supplementary material for: Influence Modeling of muddy phosphate mining waste discharge on hydrodynamics in the Beninese-Togolese coastal waters and transport of waste phases
Source: Research Square preprint supplement (doi:10.21203/rs.3.rs-6298265/v1), 2025-05-02
Supplement: Supplementary file 2 [file ef994178eb8b43ed52fd6e65.docx]

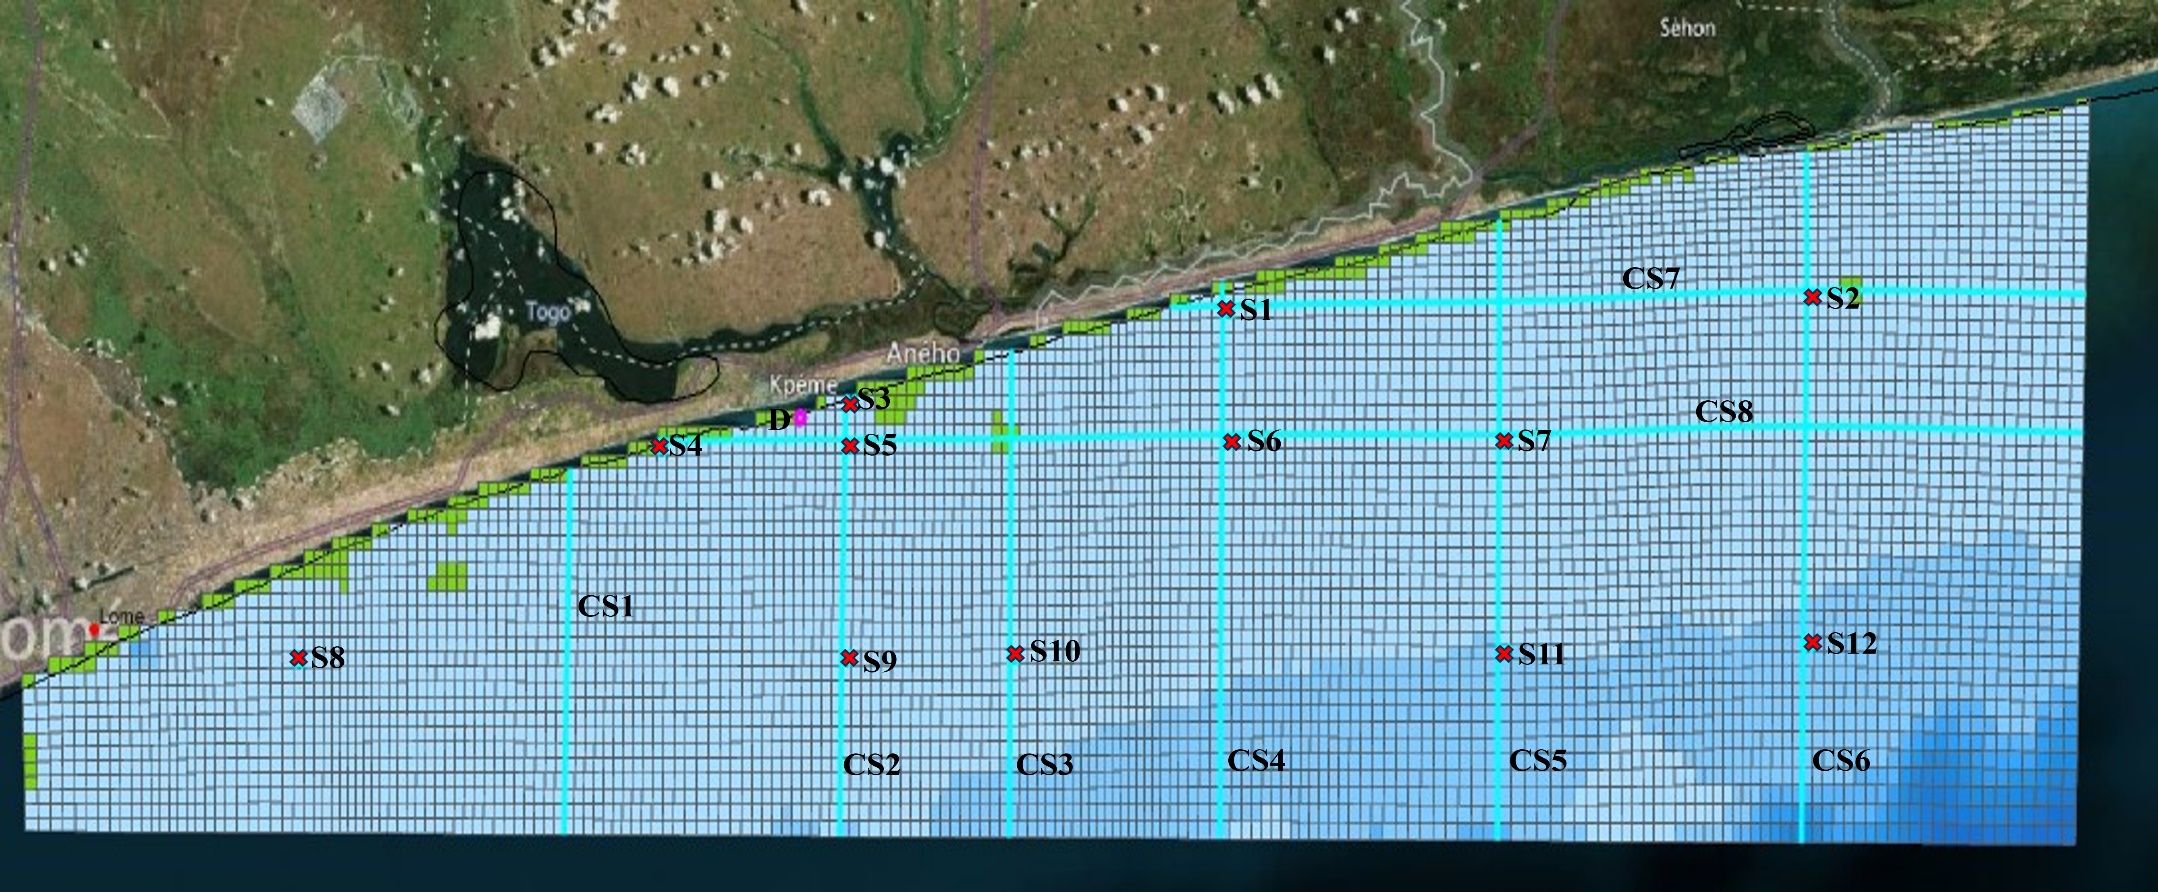


**Fig. 33** Observation Station Locations, Cross-Section, and discharge point for the two extensive seasons studied
